# Supplementary material for: Factors associated with high oxidative stress in patients with type 2 diabetes: a meta-analysis of two cohort studies
Source: PubMed Central journal article supplement — BMJ Open Diabetes Res Care. 2020 Feb 19;8(1):e000933. doi: 10.1136/bmjdrc-2019-000933 (PMC7039603; doi:10.1136/bmjdrc-2019-000933), 2020-02-19
Supplement: bmjdrc-2019-000933supp001.pdf [file bmjdrc-2019-000933supp001.pdf]

## Supplemental Material

Suppl. Table 1. Factors associated with oxidative stress cross-sectionally (defined by continuously modelled baseline D-ROM levels). Results of backwards variable selection with a generalized linear model.

| Parameter                                | DIANA         |                 | ESTHER        |                 | Meta-analysis |                 |
|------------------------------------------|---------------|-----------------|---------------|-----------------|---------------|-----------------|
|                                          | $\beta$       | p               | $\beta$       | p               | $\beta$       | p               |
| <b>Sex</b>                               | <b>58.32</b>  | <b>&lt;0.01</b> | <b>52.13</b>  | <b>&lt;0.01</b> | <b>55.17</b>  | <b>&lt;0.01</b> |
| <b>Education</b>                         |               |                 |               |                 |               |                 |
| Low                                      | Ref           |                 | Ref           |                 | Ref           |                 |
| Medium                                   | 1.45          | 0.80            | 4.30          | 0.512           | 2.66          | 0.54            |
| High                                     | -13.78        | 0.07            | 1.40          | 0.85            | -5.81         | 0.27            |
| <b>BMI (kg/m<sup>2</sup>)</b>            |               |                 |               |                 |               |                 |
| < 25                                     | Ref           |                 | Ref           |                 | Ref           |                 |
| 25 - < 30                                | 0.74          | 0.91            | -10.35        | 0.11            | -4.93         | 0.29            |
| 30 - < 35                                | 3.53          | 0.61            | -0.05         | 0.99            | 1.76          | 0.72            |
| 35 - < 40                                | 7.62          | 0.39            | 6.37          | 0.48            | 7.02          | 0.27            |
| $\geq 40$                                | <b>39.98</b>  | <b>&lt;0.01</b> | 7.24          | 0.55            | <b>26.59</b>  | <b>0.00</b>     |
| <b>Smoking</b>                           |               |                 |               |                 |               |                 |
| Never smoker                             | Ref           |                 | Ref           |                 | Ref           |                 |
| Former smoker                            | 5.26          | 0.30            | 1.84          | 0.70            | 3.46          | 0.32            |
| Current smoker, smoking 0-15 g tobacco/d | <b>33.39</b>  | <b>&lt;0.01</b> | <b>26.13</b>  | <b>0.01</b>     | <b>30.09</b>  | <b>&lt;0.01</b> |
| Current smoker, smoking > 15 g tobacco/d | <b>31.64</b>  | <b>0.00</b>     | 15.73         | 0.14            | <b>24.65</b>  | <b>&lt;0.01</b> |
| <b>HbA<sub>1c</sub> (%)</b>              |               |                 |               |                 |               |                 |
| < 6                                      | Ref           |                 | Ref           |                 | Ref           |                 |
| 6 - < 7                                  | -5.21         | 0.4215          | 6.48          | 0.24            | 1.48          | 0.73            |
| 7 - < 8                                  | 2.27          | 0.77            | <b>16.73</b>  | <b>0.01</b>     | <b>10.35</b>  | <b>0.04</b>     |
| $\geq 8$                                 | -3.19         | 0.71            | 12.78         | 0.18            | 4.08          | 0.53            |
| <b>Diabetes medication</b>               |               |                 |               |                 |               |                 |
| No                                       | Ref           |                 | Ref           |                 | Ref           |                 |
| Oral anti-diabetics                      | <b>-16.20</b> | <b>0.00</b>     | <b>-14.90</b> | <b>0.00</b>     | <b>-15.50</b> | <b>&lt;0.01</b> |
| Insulin                                  | -10.85        | 0.11            | -5.06         | 0.45            | -7.95         | 0.09            |
| <b>History of stroke</b>                 | <b>-13.16</b> | <b>0.15</b>     | <b>-10.96</b> | <b>0.09</b>     | <b>-11.71</b> | <b>0.03</b>     |
| <b>History of myocardial infarction</b>  | <b>-1.06</b>  | <b>0.91</b>     | <b>12.92</b>  | <b>0.09</b>     | <b>7.45</b>   | <b>0.20</b>     |
| <b>Coronary heart disease</b>            | <b>13.10</b>  | <b>0.07</b>     | <b>-0.80</b>  | <b>0.88</b>     | <b>4.24</b>   | <b>0.33</b>     |
| <b>Heart failure</b>                     | <b>23.39</b>  | <b>&lt;0.01</b> | <b>8.98</b>   | <b>0.11</b>     | <b>15.10</b>  | <b>&lt;0.01</b> |
| <b>History of cancer</b>                 | <b>22.41</b>  | <b>0.00</b>     | <b>7.35</b>   | <b>0.23</b>     | <b>13.74</b>  | <b>0.00</b>     |
| <b>Total cholesterol (mg/dL)</b>         |               |                 |               |                 |               |                 |
| < 200                                    | Ref           |                 | Ref           |                 | Ref           |                 |
| 200 - < 280                              | <b>13.87</b>  | <b>0.00</b>     | <b>9.80</b>   | <b>0.04</b>     | <b>11.86</b>  | <b>&lt;0.01</b> |
| $\geq 280$                               | <b>17.84</b>  | <b>0.01</b>     | <b>20.00</b>  | <b>0.01</b>     | <b>18.77</b>  | <b>&lt;0.01</b> |

Abbreviations: BMI, body mass index; HbA<sub>1c</sub>, glycated haemoglobin A<sub>1c</sub>

Suppl. Table 2. Factors associated with high oxidative stress cross-sectionally (defined by baseline D-ROM levels &gt; 400 Carr U). Results of a logistic regression model.

| Parameter                                | DIANA                    | ESTHER                   | Meta-Analysis            |
|------------------------------------------|--------------------------|--------------------------|--------------------------|
|                                          | OR (95% CI)              | OR (95% CI)              | OR (95% CI)              |
| <b>Female sex</b>                        | <b>4.85 (4.21; 5.59)</b> | <b>4.35 (3.68; 5.14)</b> | <b>4.64 (4.16; 5.16)</b> |
| <b>Education</b>                         |                          |                          |                          |
| Low                                      | Ref                      | Ref                      | Ref                      |
| Medium                                   | 1.13 (0.96; 1.32)        | 1.11 (0.90; 1.37)        | 1.12 (0.99; 1.27)        |
| High                                     | <b>0.53 (0.42; 0.68)</b> | <b>0.62 (0.46; 0.83)</b> | <b>0.57 (0.47; 0.68)</b> |
| <b>BMI (kg/m<sup>2</sup>)</b>            |                          |                          |                          |
| < 25                                     | Ref                      | Ref                      | Ref                      |
| 25 - < 30                                | 1.18 (0.98; 1.43)        | 1.07 (0.86; 1.33)        | 1.13 (0.98; 1.31)        |
| 30 - < 35                                | <b>1.27 (1.04; 1.55)</b> | <b>1.46 (1.16; 1.84)</b> | <b>1.35 (1.16; 1.57)</b> |
| 35 - < 40                                | <b>1.72 (1.33; 2.21)</b> | <b>1.54 (1.15; 2.05)</b> | <b>1.64 (1.35; 1.98)</b> |
| ≥ 40                                     | <b>3.17 (2.37; 4.23)</b> | <b>2.34 (1.61; 3.39)</b> | <b>2.83 (2.25; 3.55)</b> |
| <b>Smoking</b>                           |                          |                          |                          |
| Never smoker                             | Ref                      | Ref                      | Ref                      |
| Former smoker                            | <b>1.31 (1.13; 1.52)</b> | 1.08 (0.92; 1.28)        | <b>1.20 (1.08; 1.34)</b> |
| Current smoker, smoking 0-15 g tobacco/d | <b>3.17 (2.44; 4.14)</b> | 1.32 (0.95; 1.82)        | <b>2.23 (1.82; 2.74)</b> |
| Current smoker, smoking > 15 g tobacco/d | <b>2.70 (2.07; 3.52)</b> | <b>1.50 (1.06; 2.12)</b> | <b>2.17 (1.76; 2.68)</b> |
| <b>HbA<sub>1c</sub> (%)</b>              |                          |                          |                          |
| < 6                                      | Ref                      | Ref                      | Ref                      |
| 6 - < 7                                  | 1.04 (0.86; 1.25)        | 1.09 (0.91; 1.31)        | 1.06 (0.93; 1.21)        |
| 7 - < 8                                  | 1.22 (0.97; 1.52)        | <b>1.43 (1.14; 1.80)</b> | <b>1.32 (1.12; 1.54)</b> |
| ≥ 8                                      | 1.24 (0.97; 1.60)        | <b>1.61 (1.12; 2.21)</b> | <b>1.38 (1.13; 1.68)</b> |
| <b>Diabetes medication</b>               |                          |                          |                          |
| No                                       | Ref                      | Ref                      | Ref                      |
| Oral anti-diabetics                      | <b>0.59 (0.51; 0.69)</b> | <b>0.54 (0.45; 0.63)</b> | <b>0.57 (0.51; 0.63)</b> |
| Insulin                                  | <b>0.69 (0.57; 0.83)</b> | <b>0.74 (0.60; 0.93)</b> | <b>0.71 (0.62; 0.82)</b> |
| <b>History of stroke</b>                 | 0.82 (0.63; 1.06)        | 0.88 (0.70; 1.11)        | 0.85 (0.72; 1.02)        |
| <b>History of myocardial infarction</b>  | 1.11 (0.85; 1.44)        | <b>1.50 (1.17; 1.94)</b> | <b>1.31 (1.08; 1.56)</b> |
| <b>Coronary heart disease</b>            | 1.16 (0.95; 1.41)        | 0.95 (0.79; 1.15)        | 1.05 (0.91; 1.20)        |
| <b>Heart failure</b>                     | <b>1.53 (1.28; 1.84)</b> | <b>1.32 (1.10; 1.58)</b> | <b>1.42 (1.25; 1.62)</b> |
| <b>History of cancer</b>                 | <b>1.89 (1.56; 2.29)</b> | 1.17 (0.95; 1.43)        | <b>1.50 (1.31; 1.73)</b> |
| <b>Total cholesterol (mg/dL)</b>         |                          |                          |                          |
| < 200                                    | Ref                      | Ref                      | Ref                      |
| 200 - < 280                              | <b>1.26 (1.10; 1.44)</b> | <b>1.43 (1.21; 1.68)</b> | <b>1.32 (1.19; 1.47)</b> |
| ≥ 280                                    | <b>1.51 (1.24; 1.84)</b> | <b>1.59 (1.24; 2.04)</b> | <b>1.54 (1.32; 1.80)</b> |

Abbreviations: BMI, body mass index; 95% CI, 95% confidence interval; HbA<sub>1c</sub>, glycated haemoglobin A<sub>1c</sub>.

Suppl. Table 3. Factors associated with oxidative stress longitudinally (defined by continuously modelled  $\Delta$  D-ROM levels). Results of backwards variable selection with a generalized linear model.

| Parameter                                    | Diana         |                 | Esther        |                 | Meta-analysis |                 |
|----------------------------------------------|---------------|-----------------|---------------|-----------------|---------------|-----------------|
|                                              | $\beta$       | p               | $\beta$       | p               | $\beta$       | p               |
| <b>Age (years)</b>                           |               |                 |               |                 |               |                 |
| < 60                                         | Ref           |                 | Ref           |                 | Ref           |                 |
| 60 - < 70                                    | 0.59          | 0.93            | 15.69         | 0.05            | 6.96          | 0.19            |
| 70 - < 80                                    | 2.60          | 0.71            | <b>19.74</b>  | <b>0.02</b>     | 9.68          | 0.07            |
| $\geq$ 80                                    | 5.06          | 0.61            | <b>28.06</b>  | <b>0.01</b>     | <b>15.62</b>  | <b>0.03</b>     |
| <b>Female sex</b>                            | <b>15.01</b>  | <b>0.01</b>     | <b>14.65</b>  | <b>0.00</b>     | <b>14.79</b>  | <b>&lt;0.01</b> |
| <b>BMI (kg/m<sup>2</sup>)</b>                |               |                 |               |                 |               |                 |
| < 25                                         | Ref           |                 | Ref           |                 | Ref           |                 |
| 25 - < 30                                    | -0.03         | 1.00            | -3.59         | 0.53            | -3.37         | 0.45            |
| 30 - < 35                                    | -2.74         | 0.71            | -0.96         | 0.87            | -1.67         | 0.72            |
| 35 - < 40                                    | 17.89         | 0.07            | 4.94          | 0.53            | 10.10         | 0.10            |
| $\geq$ 40                                    | <b>26.378</b> | <b>0.02</b>     | 7.36          | 0.52            | <b>16.94</b>  | <b>0.03</b>     |
| <b>Smoking</b>                               |               |                 |               |                 |               |                 |
| Never smoker                                 | Ref           |                 | Ref           |                 | Ref           |                 |
| Former smoker                                | 2.95          | 0.59            | 0.81          | 0.85            | 1.61          | 0.63            |
| Current smoker, smoking 0-15 g tobacco/d     | 14.38         | 0.17            | 6.94          | 0.48            | 10.43         | 0.15            |
| Current smoker, smoking >15 g tobacco/d      | 17.57         | 0.12            | 17.56         | 0.07            | <b>17.56</b>  | <b>0.02</b>     |
| <b>Alcohol consumption</b>                   |               |                 |               |                 |               |                 |
| Abstainer                                    | Ref           |                 | Ref           |                 | Ref           |                 |
| Low consumption                              | 3.71          | 0.47            | 4.52          | 0.27            | 4.21          | 0.19            |
| Moderate consumption                         | -7.06         | 0.56            | 4.51          | 0.66            | -0.38         | 0.96            |
| High consumption                             | <b>42.47</b>  | <b>0.04</b>     | -0.87         | 0.96            | 14.35         | 0.25            |
| <b>Physical activity (active)</b>            | -0.46         | 0.94            | <b>-9.31</b>  | <b>0.01</b>     | <b>-6.77</b>  | <b>0.03</b>     |
| <b>Diabetes medication</b>                   |               |                 |               |                 |               |                 |
| No                                           | Ref           |                 | Ref           |                 | Ref           |                 |
| Oral anti-diabetics                          | -5.13         | 0.37            | 3.31          | 0.43            | 0.32          | 0.96            |
| Insulin                                      | 4.32          | 0.58            | <b>14.26</b>  | <b>0.02</b>     | <b>10.45</b>  | <b>0.03</b>     |
| <b>Time since diabetes diagnosis (years)</b> |               |                 |               |                 |               |                 |
| < 5                                          | Ref           |                 | Ref           |                 | Ref           |                 |
| 5 - < 10                                     | -1.20         | 0.84            | -6.26         | 0.23            | -4.13         | 0.29            |
| 10 - < 20                                    | 10.53         | 0.09            | <b>-12.03</b> | <b>0.03</b>     | -1.76         | 0.67            |
| $\geq$ 20                                    | 1.99          | 0.84            | -12.41        | 0.18            | -5.738        | 0.397           |
| <b>Baseline D-ROM (per 10 Carr Units)</b>    | <b>-3.66</b>  | <b>&lt;0.01</b> | <b>-5.46</b>  | <b>&lt;0.01</b> | <b>-4.71</b>  | <b>&lt;0.01</b> |

Abbreviations: BMI, body mass index.

Suppl. Table 4. Factors associated with high oxidative stress longitudinally (defined by D-ROM levels &gt; 400 Carr U at follow-up). Results of a logistic regression model.

| Parameter                                    | DIANA                    | ESTHER                   | Meta-Analysis            |
|----------------------------------------------|--------------------------|--------------------------|--------------------------|
|                                              | OR (95% CI)              | OR (95% CI)              | OR (95% CI)              |
| <b>Age (years)</b>                           |                          |                          |                          |
| < 60                                         | Ref                      | Ref                      | Ref                      |
| 60 - < 70                                    | 1.08 (0.84; 1.39)        | <b>2.24 (1.28; 3.92)</b> | 1.22 (0.97; 1.54)        |
| 70 - < 80                                    | <b>1.35 (1.05; 1.74)</b> | <b>2.50 (1.42; 4.40)</b> | <b>1.50 (1.19; 1.88)</b> |
| ≥ 80                                         | <b>1.67 (1.16; 2.42)</b> | 2.02 (1.00; 4.10)        | <b>1.74 (1.26; 2.41)</b> |
| <b>Female sex</b>                            | <b>2.10 (1.72; 2.57)</b> | <b>2.24 (1.28; 3.92)</b> | <b>2.12 (1.75; 2.56)</b> |
| <b>BMI (kg/m<sup>2</sup>)</b>                |                          |                          |                          |
| < 25                                         | Ref                      | Ref                      | Ref                      |
| 25 - < 30                                    | 0.86 (0.66; 1.10)        | 1.05 (0.76; 1.45)        | 0.93 (0.76; 1.14)        |
| 30 - < 35                                    | <b>0.73 (0.56; 0.96)</b> | 0.88 (0.63; 1.24)        | <b>0.79 (0.64; 0.97)</b> |
| 35 - < 40                                    | <b>1.82 (1.25; 2.63)</b> | <b>2.08 (1.40; 3.09)</b> | <b>1.94 (1.48; 2.54)</b> |
| ≥ 40                                         | <b>1.91 (1.21; 3.03)</b> | 1.61 (0.94; 2.75)        | <b>1.78 (1.25; 2.52)</b> |
| <b>Smoking</b>                               |                          |                          |                          |
| Never smoker                                 | Ref                      | Ref                      | Ref                      |
| Former smoker                                | <b>1.23 (1.01; 1.50)</b> | <b>1.52 (1.20; 1.94)</b> | <b>1.34 (1.15; 1.56)</b> |
| Current smoker, smoking 0-15 g tobacco/d     | 1.21 (0.83; 1.77)        | <b>1.76 (1.07; 2.90)</b> | <b>1.39 (1.03; 1.88)</b> |
| Current smoker, smoking >15 g tobacco/d      | <b>2.22 (1.45; 3.38)</b> | 0.80 (0.45; 1.43)        | <b>1.56 (1.11; 2.19)</b> |
| <b>Alcohol consumption</b>                   |                          |                          |                          |
| Abstainer                                    | Ref                      | Ref                      | Ref                      |
| Low consumption                              | 1.07 (0.89; 1.29)        | 0.99 (0.79; 1.24)        | 1.04 (0.90; 1.20)        |
| Moderate consumption                         | <b>0.45 (0.29; 0.69)</b> | 0.78 (0.42; 1.46)        | <b>0.54 (0.38; 0.77)</b> |
| High consumption                             | <b>3.38 (1.60; 7.14)</b> | 1.08 (0.45; 2.61)        | <b>2.09 (1.18; 3.70)</b> |
| <b>Physical activity (active)</b>            | 1.09 (0.89; 1.35)        | <b>0.68 (0.55; 0.84)</b> | 0.86 (0.75; 1.00)        |
| <b>Diabetes medication</b>                   |                          |                          |                          |
| No                                           | Ref                      | Ref                      | Ref                      |
| Oral anti-diabetics                          | <b>0.73 (0.59; 0.89)</b> | 1.17 (0.92; 1.49)        | 0.89 (0.76; 1.04)        |
| Insulin                                      | 1.11 (0.83; 1.48)        | 1.34 (0.96; 1.87)        | 1.20 (0.97; 1.45)        |
| <b>Time since diabetes diagnosis (years)</b> |                          |                          |                          |
| < 5                                          | Ref                      | Ref                      | Ref                      |
| 5 - < 10                                     | <b>1.41 (1.14; 1.75)</b> | 1.24 (0.97; 1.58)        | <b>1.33 (1.34; 1.57)</b> |
| 10 - < 20                                    | <b>1.43 (1.15; 1.79)</b> | 0.89 (0.64; 1.24)        | <b>1.24 (1.03; 1.48)</b> |
| ≥ 20                                         | 1.33 (0.93; 1.89)        | 1.13 (0.72; 1.75)        | 1.25 (0.95; 1.65)        |
| <b>Baseline D-ROM (per 10 Carr Units)</b>    | <b>1.21 (1.19; 1.23)</b> | <b>1.20 (1.18; 1.22)</b> | <b>1.21 (1.19; 1.22)</b> |

Abbreviations: BMI, body mass index; 95% CI, 95% confidence interval; D-ROM; Diacron's reactive oxygen metabolites.

Suppl. Table 5. Factors associated with oxidative stress cross-sectionally (defined by continuously modelled baseline D-ROM levels) in a model adjusted for CRP

| Parameter                                | DIANA         |                 | ESTHER         |                 | Meta-Analysis |                 |
|------------------------------------------|---------------|-----------------|----------------|-----------------|---------------|-----------------|
|                                          | $\beta$       | p               | $\beta$        | p               | $\beta$       | p               |
| <b>Sex</b>                               | <b>55.95</b>  | <b>&lt;0.01</b> | <b>48.13</b>   | <b>&lt;0.01</b> | <b>51.92</b>  | <b>&lt;0.01</b> |
| <b>Education</b>                         |               |                 |                |                 |               |                 |
| Low                                      | Ref           |                 | Ref            |                 | Ref           |                 |
| Medium                                   | 3.69          | 0.50            | 3.77           | 0.55            | 3.72          | 0.37            |
| High                                     | -7.53         | 0.30            | 4.75           | 0.49            | -0.99         | 0.84            |
| <b>BMI (kg/m<sup>2</sup>)</b>            |               |                 |                |                 |               |                 |
| < 25                                     | Ref           |                 | Ref            |                 | Ref           |                 |
| 25 - < 30                                | -0.96         | 0.88            | <b>-12.83</b>  | <b>0.04</b>     | -7.10         | 0.11            |
| 30 - < 35                                | -0.84         | 0.90            | -10.37         | 0.12            | -5.58         | 0.23            |
| 35 - < 40                                | -1.08         | 0.90            | -8.72          | 0.32            | -4.79         | 0.43            |
| $\geq 40$                                | <b>23.10</b>  | <b>0.02</b>     | -10.37         | 0.37            | 9.13          | 0.22            |
| <b>Smoking</b>                           |               |                 |                |                 |               |                 |
| Never smoker                             | Ref           |                 | Ref            |                 | Ref           |                 |
| Former smoker                            | 2.07          | 0.67            | 2.32           | 0.61            | 2.20          | 0.51            |
| Current smoker, smoking 0-15 g tobacco/d | <b>27.98</b>  | <b>0.00</b>     | 17.32          | 0.08            | <b>23.04</b>  | <b>0.00</b>     |
| Current smoker, smoking >15 g tobacco/d  | <b>20.92</b>  | <b>0.02</b>     | 12.32          | 0.22            | <b>17.06</b>  | <b>0.01</b>     |
| <b>Total cholesterol (mg/dL)</b>         |               |                 |                |                 |               |                 |
| < 200                                    |               |                 |                |                 |               |                 |
| 200 - < 280                              | <b>11.46</b>  | <b>0.01</b>     | 8.17           | 0.06            | <b>9.82</b>   | <b>0.00</b>     |
| $\geq 280$                               | <b>14.04</b>  | <b>0.04</b>     | <b>18.20</b>   | <b>0.02</b>     | <b>15.90</b>  | <b>0.00</b>     |
| <b>HbA<sub>1c</sub> (%)</b>              |               |                 |                |                 |               |                 |
| < 6                                      | Ref           |                 | Ref            |                 | Ref           |                 |
| 6 - < 7                                  | -7.24         | 0.234           | 6.54           | 0.21            | 0.74          | 0.85            |
| 7 - < 8                                  | -2.00         | 0.78            | 11.31          | 0.08            | 5.51          | 0.25            |
| $\geq 8$                                 | -4.26         | 0.61            | 5.36           | 0.55            | 0.72          | 0.98            |
| <b>Diabetes medication</b>               |               |                 |                |                 |               |                 |
| No                                       | Ref           |                 | Ref            |                 | Ref           |                 |
| Oral anti-diabetics                      | <b>-15.73</b> | <b>0.00</b>     | <b>-11.555</b> | <b>0.01</b>     | <b>-13.48</b> | <b>&lt;0.01</b> |
| Insulin                                  | -11.28        | 0.08            | -1.61          | 0.80            | -6.36         | 0.16            |
| <b>History of stroke</b>                 | -8.57         | 0.33            | -9.47          | 0.13            | -9.17         | 0.07            |
| <b>History of myocardial infarction</b>  | 3.72          | 0.68            | 10.99          | 0.12            | 8.20          | 0.14            |
| <b>Coronary heart disease</b>            | 9.39          | 0.19            | -3.16          | 0.55            | 1.26          | 0.76            |
| <b>Heart failure</b>                     | <b>17.09</b>  | <b>0.01</b>     | 7.11           | 0.18            | <b>11.24</b>  | <b>0.01</b>     |
| <b>History of cancer</b>                 | <b>23.02</b>  | <b>0.00</b>     | 6.39           | 0.27            | <b>12.87</b>  | <b>0.01</b>     |
| <b>CRP (mg/L)</b>                        |               |                 |                |                 |               |                 |
| $\leq 3$                                 | Ref           |                 | Ref            |                 | Ref           |                 |
| > 3 - $\leq 10$                          | <b>30.80</b>  | <b>&lt;0.01</b> | <b>33.32</b>   | <b>&lt;0.01</b> | <b>32.08</b>  | <b>&lt;0.01</b> |
| > 10                                     | <b>61.02</b>  | <b>&lt;0.01</b> | <b>66.06</b>   | <b>&lt;0.01</b> | <b>63.77</b>  | <b>&lt;0.01</b> |

Abbreviations: BMI, body mass index; CRP, C-reactive protein; HbA<sub>1c</sub>, glycated haemoglobin A<sub>1c</sub>.

Suppl. Table 6. Factors associated with oxidative stress longitudinally (defined by continuously modelled  $\Delta$  D-ROM levels) in a model adjusted for CRP

| Parameter                                    | DIANA        |                 | ESTHER        |                 | Meta-analysis |                 |
|----------------------------------------------|--------------|-----------------|---------------|-----------------|---------------|-----------------|
|                                              | $\beta$      | p               | $\beta$       | p               | $\beta$       | p               |
| <b>Age (years)</b>                           |              |                 |               |                 |               |                 |
| < 60                                         |              |                 |               |                 |               |                 |
| 60 - < 70                                    | 0.41         | 0.95            | 15.51         | 0.06            | 6.75          | 0.20            |
| 70 - < 80                                    | 2.43         | 0.73            | <b>18.77</b>  | <b>0.02</b>     | 9.14          | 0.09            |
| $\geq$ 80                                    | 3.18         | 0.75            | <b>27.21</b>  | <b>0.01</b>     | 14.18         | 0.05            |
| <b>Gender</b>                                | <b>14.18</b> | <b>0.01</b>     | <b>14.80</b>  | <b>0.00</b>     | <b>14.56</b>  | <b>&lt;0.01</b> |
| <b>BMI (kg/m<sup>2</sup>)</b>                |              |                 |               |                 |               |                 |
| < 25                                         |              |                 |               |                 |               |                 |
| 25 - < 30                                    | -1.12        | 0.88            | -4.29         | 0.45            | -3.08         | 0.49            |
| 30 - < 35                                    | -4.62        | 0.54            | -3.45         | 0.58            | -3.93         | 0.41            |
| 35 - < 40                                    | 14.83        | 0.13            | 2.13          | 0.79            | 7.24          | 0.24            |
| $\geq$ 40                                    | <b>25.03</b> | <b>0.03</b>     | 2.88          | 0.80            | 14.15         | 0.08            |
| <b>Smoking</b>                               |              |                 |               |                 |               |                 |
| Never smoker                                 |              |                 |               |                 |               |                 |
| Former smoker                                | 1.53         | 0.78            | 0.70          | 0.87            | 1.01          | 0.76            |
| Current smoker, smoking 0-15 g tobacco/d     | 11.11        | 0.29            | 5.06          | 0.61            | 7.90          | 0.28            |
| Current smoker, smoking >15 g tobacco/d      | 17.84        | 0.11            | 17.59         | 0.07            | <b>17.69</b>  | <b>0.02</b>     |
| <b>Alcohol consumption</b>                   |              |                 |               |                 |               |                 |
| Abstainer                                    |              |                 |               |                 |               |                 |
| Low consumption                              | 3.30         | 0.52            | 4.74          | 0.24            | 4.18          | 0.19            |
| Moderate consumption                         | -5.67        | 0.63            | 4.88          | 0.63            | 0.40          | 0.96            |
| High consumption                             | 34.90        | 0.10            | -1.48         | 0.92            | 11.30         | 0.37            |
| <b>Physical activity (active)</b>            | -0.94        | 0.87            | <b>-8.58</b>  | <b>0.02</b>     | <b>-6.37</b>  | <b>0.043</b>    |
| <b>Diabetes medication</b>                   |              |                 |               |                 |               |                 |
| No                                           |              |                 |               |                 |               |                 |
| Oral anti-diabetics                          | -5.79        | 0.30            | 3.47          | 0.41            | 0.18          | 0.96            |
| Insulin                                      | 3.79         | 0.63            | <b>13.69</b>  | <b>0.03</b>     | <b>9.88</b>   | <b>0.04</b>     |
| <b>Time since diabetes diagnosis (years)</b> |              |                 |               |                 |               |                 |
| < 5                                          |              |                 |               |                 |               |                 |
| 5 - < 10                                     | -0.80        | 0.89            | -5.91         | 0.25            | -3.75         | 0.33            |
| 10 - < 20                                    | 11.93        | 0.05            | <b>-11.58</b> | <b>0.04</b>     | 1.01          | 0.08            |
| $\geq$ 20                                    | 3.37         | 0.73            | -10.93        | 0.25            | -4.21         | 0.54            |
| <b>Baseline D-ROM (per 10 Carr Units)</b>    | <b>-3.74</b> | <b>&lt;0.01</b> | <b>-5.67</b>  | <b>&lt;0.01</b> | <b>-4.86</b>  | <b>&lt;0.01</b> |
| <b>CRP (mg/L)</b>                            |              |                 |               |                 |               |                 |
| $\leq$ 3                                     |              |                 |               |                 |               |                 |
| > 3 - $\leq$ 10                              | <b>14.06</b> | <b>0.01</b>     | 7.17          | 0.09            | <b>9.87</b>   | <b>0.00</b>     |
| > 10                                         | -10.18       | 0.25            | <b>14.41</b>  | <b>0.05</b>     | 4.37          | 0.43            |

Abbreviations: BMI, body mass index; CRP, C-reactive protein; D-ROM; Diacron's reactive oxygen metabolites.
